# Supplementary material for: The antibody drug conjugate VLS-101 targeting ROR1 is effective in CAR T-resistant mantle cell lymphoma
Source: PubMed Central journal article supplement (PMC8400406; doi:10.1186/s13045-021-01143-w), 2021-08-28
Supplement: 13045_2021_1143_MOESM1_ESM.pdf [file 13045_2021_1143_MOESM1_ESM.pdf]

# Supplementary Figure S1

**A**

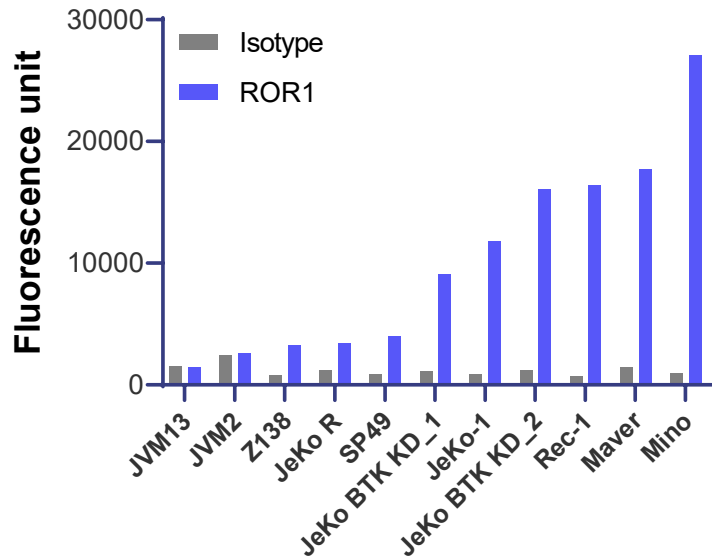

**B**

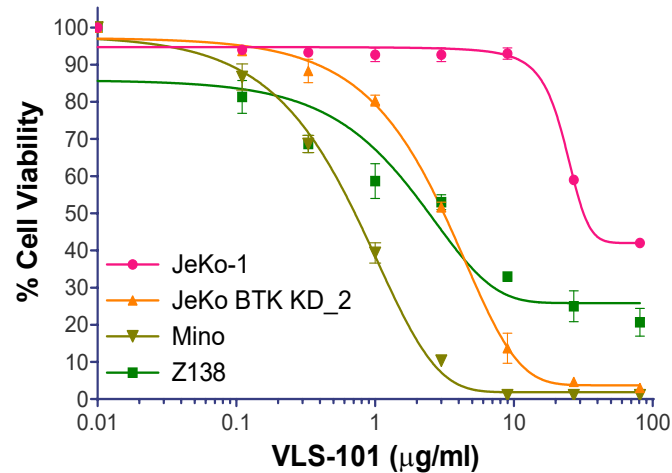

**C**

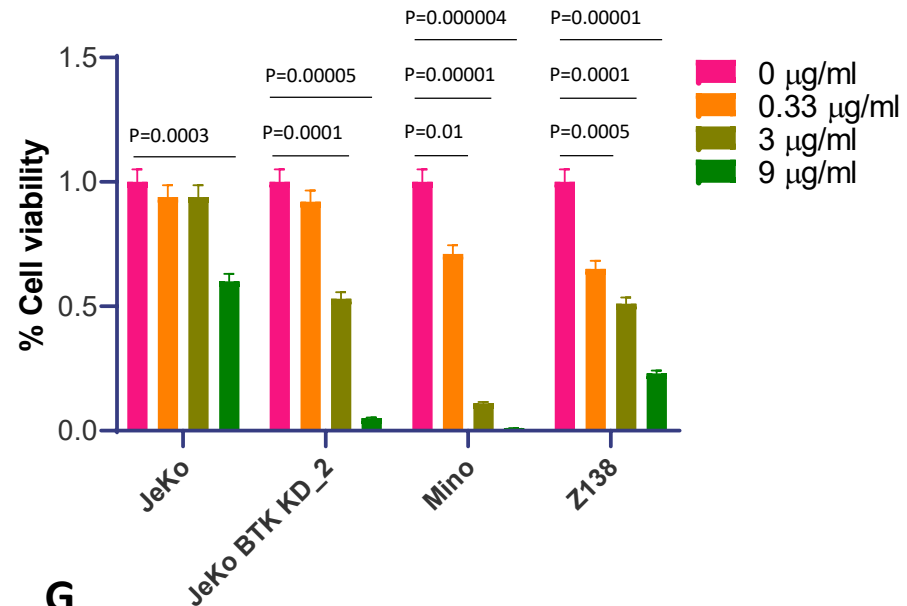

**D**

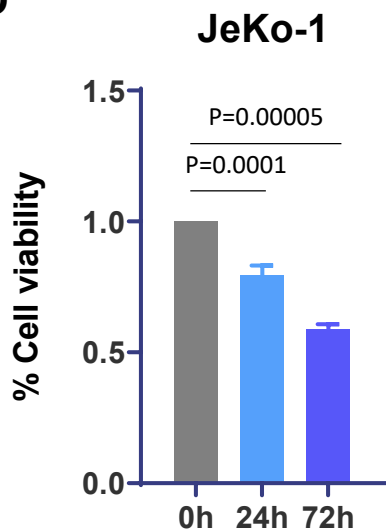

**E**

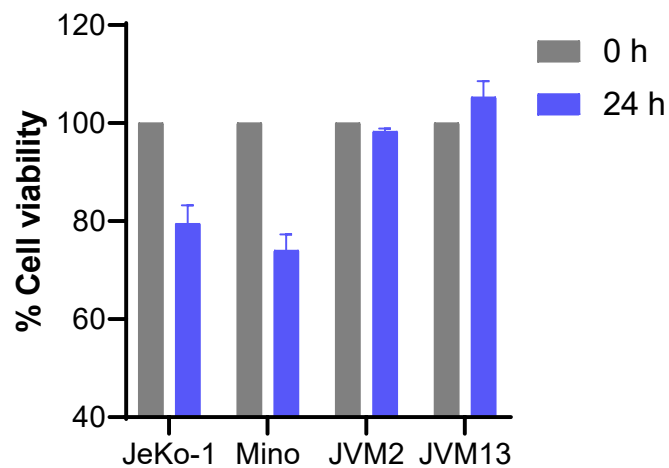

**F**

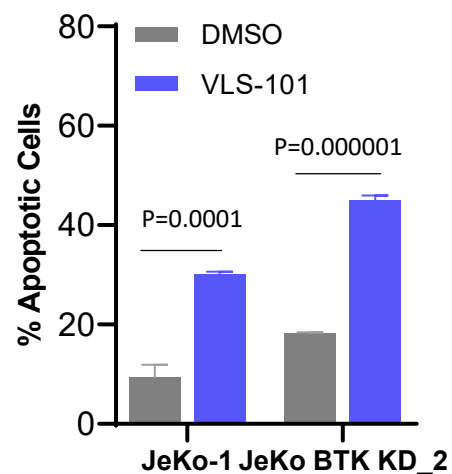

**G**

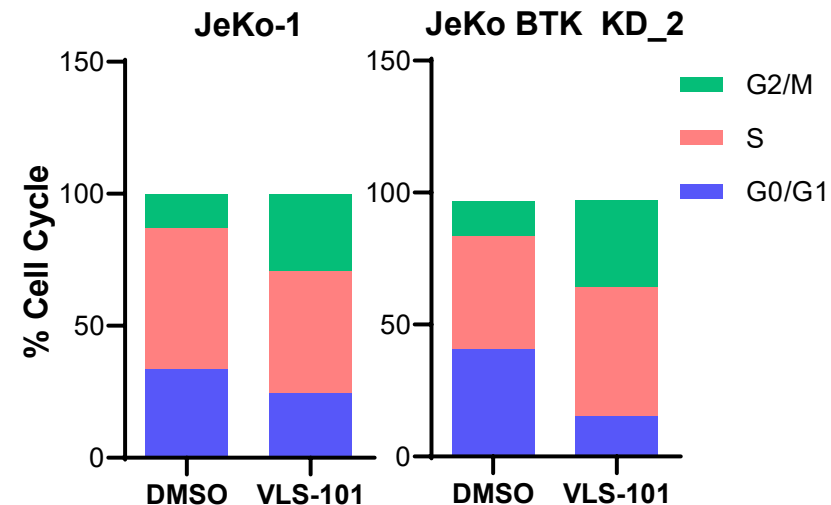

Supplementary Figure S2

A

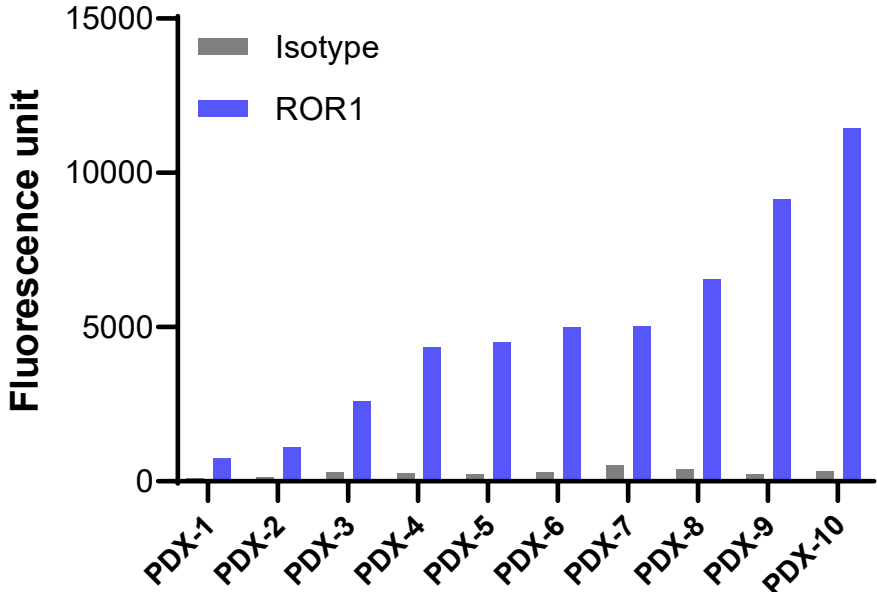

B

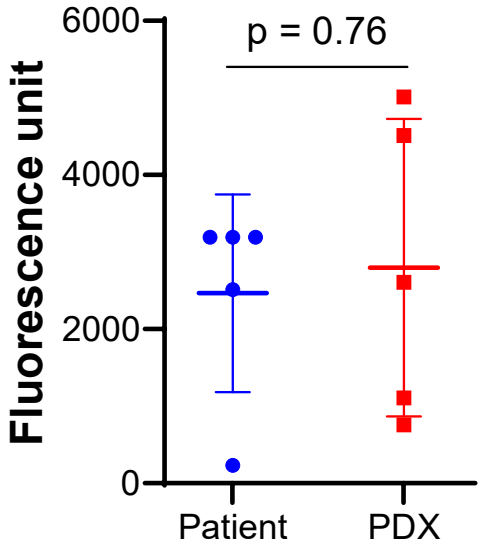

# Supplementary Figure S3

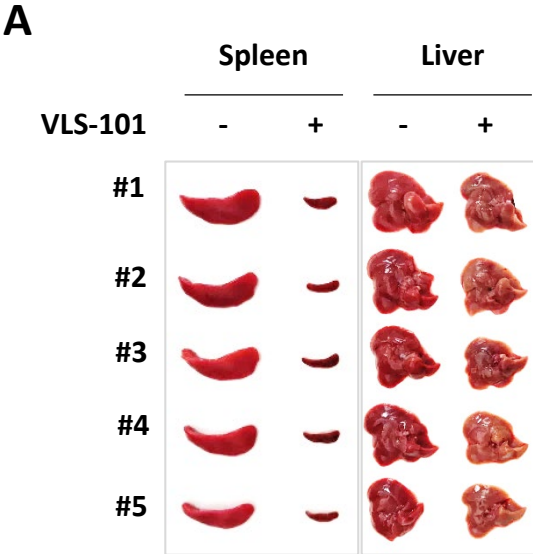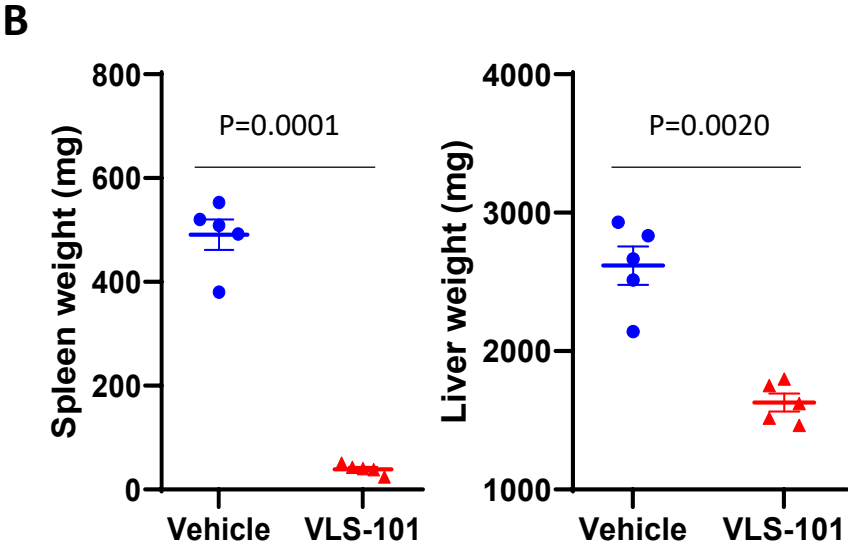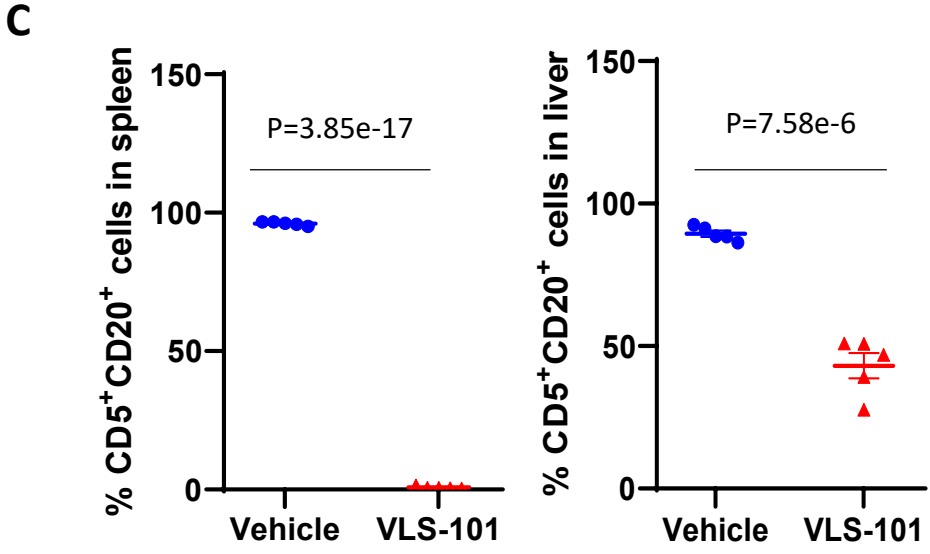

## Supplementary Figures

**Figure S1. ROR1 expression and ROR1 targeting in MCL cell lines.** (A) ROR1 expression detected by flow cytometry in MCL cell lines (n = 11). (B) *In vitro* efficacy of VLS-101 in 4 representative MCL cell lines, JeKo-1, JeKo-BTK-KD, Mino and Z138 at 72 h post treatment with VLS-101. (C) Dose-dependent inhibition of cell viability by VLS-101 at 24 h post treatment in MCL cell lines. (D) Time-dependent inhibition of cell viability by VLS-101 treatment in JeKo-1 cells. (E) ROR1 expression dependent cell viability inhibition at 24 h post treatment. Note the lack of VLS-101 inhibitory effect in ROR1-negative cells (JVM2 and JVM13). (F-G) Cell apoptosis (F) and cell cycle arrest (G) induction by VLS-101 at 24 h post treatment in ibrutinib-sensitive (JeKo-1) and resistant (JeKo BTK KD\_2) cell lines. Student *t* test was used to calculate statistical significance.

**Figure S2. ROR1 expression in PDX models and their parental patient samples.** (A) ROR1 expression detected by flow cytometry in MCL PDX models (n = 10). (B) Comparison of ROR1 expression levels between parental clinical samples and PDX models using flow cytometry (n = 5).

**Figure S3. VLS-101 is potent in targeting MCL cells in ROR1-expressing PDX models with dual resistance to ibrutinib and venetoclax.** A PDX model was established from an ibrutinib-venetoclax dual resistant MCL patient tumor using a multi-generational expansion in immunodeficient NSG mice. Fresh isolated PDX cells from the spleen of previous mouse generation were inoculated intravenously into NSG mice. At 2 weeks post cell inoculation, the mice were treated intravenously with vehicle (n = 5) or VLS-101 (n = 5) at 2.5 mg/kg (QW x 3). (A-C) At 8 weeks post cell inoculation, the mouse spleen (left panel) and liver (right panel) were dissected, imaged (A) and weighted (B). The percentage of MCL cells in the spleen (left panel) and liver (right panel) were detected by flow cytometry with fluorescence conjugated CD5 and CD20 antibodies (C). Student *t* test was used to calculate statistical significance.
